1 **Delving into PubMed Records: Some Terms in Medical Writing Have Drastically Changed**  
2 **after the Arrival of ChatGPT**

3

4 Kentaro Matsui<sup>1,2\*</sup>

5

6 <sup>1</sup>Department of Clinical Laboratory, National Center Hospital, National Center of Neurology  
7 and Psychiatry, 4-1-1 Ogawa-Higashi, Kodaira-shi, Tokyo, 187-8551, Japan

8 <sup>2</sup>Department of Sleep-Wake Disorders, National Institute of Mental Health, National Center  
9 of Neurology and Psychiatry, 4-1-1 Ogawa-Higashi, Kodaira-shi, Tokyo, 187-8553, Japan

10

11 **\*Corresponding author:**

12 Kentaro Matsui, MD PhD, Department of Clinical Laboratory, National Center Hospital,  
13 National Center of Neurology and Psychiatry, 4-1-1 Ogawa-Higashi, Kodaira-shi, Tokyo, 187-  
14 8551, Japan, [matsui.kentaro@ncnp.go.jp](mailto:matsui.kentaro@ncnp.go.jp)

15

1 **Abstract**

2 **Objective:**

3 This study aims to investigate whether the usage of specific terminologies has increased,  
4 focusing on words and phrases frequently reported as overused by ChatGPT.

5 **Materials and Methods:**

6 The list of 117 potentially AI-influenced terms was curated based on posts and comments  
7 from anonymous ChatGPT users, and 75 common academic phrases were used as controls.  
8 PubMed records from 2000 to 2024 (until April) were analyzed to track the frequency of  
9 these terms. Usage trends were normalized using a modified Z-score transformation. A  
10 linear mixed-effects model was used to compare the usage of potentially AI-influenced  
11 terms to common academic phrases over time.

12 **Results:**

13 A total of 26,403,493 PubMed records were investigated. Among the potentially AI-  
14 influenced terms, 74 displayed a meaningful increase (modified Z-score  $\geq 3.5$ ) in usage in  
15 2024. The linear mixed-effects model showed a significant effect of potentially AI-influenced  
16 terms on usage frequency compared to common academic phrases ( $p < 0.001$ ). The usage of  
17 potentially AI-influenced terms showed a noticeable increase starting in 2020.

18 **Discussion:**

19 This study revealed that certain words and phrases, such as "delve," "underscore,"  
20 "meticulous," and "commendable," have been used more frequently in medical and  
21 biological fields since the introduction of ChatGPT. The usage rate of these words/phrases  
22 has been increasing for several years before the release of ChatGPT, suggesting that ChatGPT  
23 might have accelerated the popularity of scientific expressions that were already gaining  
24 traction.

25 **Conclusions:**

26 The identified terms in this study can provide valuable insights for both LLM users, educators,

1 and supervisors in these fields.

2

3 **Keywords:**

4 ChatGPT, large language models, academic writing, scientific terminology, PubMed, AI-influenced terms,

5 medical literature, language evolution.

6

## 1 Introduction

2 ChatGPT rapidly achieved widespread global use after its launch on November 30, 2022.  
3 Trained on a vast corpus of text data, the large language model (LLM) including ChatGPT  
4 generates natural language with remarkable fluency. Shortly after its release, ChatGPT's  
5 applicability for scientific writing in medical and biological fields became evident.<sup>1,2</sup> Due to  
6 the fervor surrounding its capabilities, it was credited as an author on several papers,  
7 igniting considerable debate (currently, AI is not acknowledged as an author in scholarly  
8 publications<sup>3</sup>). There were even opinions that the use of ChatGPT in paper writing was  
9 plagiarism<sup>4</sup>, but in reality, LLMs such as ChatGPT, Gemini, and Claude are already being used  
10 in paper writing. The use of LLMs can be applied in various ways in academic writing<sup>1,5</sup> and is  
11 also important for the research activities of non-native researchers whose first language is  
12 not English.<sup>6-8</sup> Presently, a framework has been established that permits the use of LLMs in  
13 writing, provided their involvement is adequately acknowledged.<sup>3</sup>  
14 While LLMs can produce natural writing, their output also exhibits certain characteristics.<sup>9,10</sup>  
15 Recently, it became a topic of discussion on X (formerly Twitter) and Reddit that ChatGPT  
16 frequently outputs the word 'delve'  
17 ([https://www.reddit.com/r/mildlyinfuriating/comments/1bzvgqj/apparently\\_using\\_the\\_wor](https://www.reddit.com/r/mildlyinfuriating/comments/1bzvgqj/apparently_using_the_word_delve_is_a_sign_of_the/)  
18 [d\\_delve\\_is\\_a\\_sign\\_of\\_the/](https://www.reddit.com/r/mildlyinfuriating/comments/1bzvgqj/apparently_using_the_word_delve_is_a_sign_of_the/) [Accessed 2024, April 12]). In addition, recent reports focusing  
19 on detecting text generated by LLMs have identified several frequently used words, such as  
20 'commendable,' 'meticulous,' 'intricate,' and 'realm.'<sup>11-14</sup> The extraction of these  
21 characteristic keywords of LLMs in these previous reports was performed by comparing  
22 human-generated text with ChatGPT-generated text.<sup>11,13,14</sup> While this approach revealed  
23 ChatGPT's characteristics among the words commonly used by both humans and ChatGPT, it  
24 had methodological limitations in extracting words with low usage frequencies. Clarifying  
25 the word expressions that LLMs tend to use in medical and biological papers is crucial for  
26 designing academic writing support and medical education programs.<sup>15</sup> Moreover, revealing

1 the extent of ChatGPT's impact on papers in the medical and biological fields is essential for  
2 maintaining the fairness and reliability of academic research and from the perspective of  
3 research ethics.<sup>16</sup> However, the existing literature lacks a thorough investigation of the  
4 specific ways in which ChatGPT has transformed academic writing practices in the medical  
5 and biological disciplines, necessitating further research.

6 As the usefulness of LLMs becomes more evident, the number of researchers using LLMs for  
7 writing papers has been gradually increasing.<sup>11,13,17</sup> It would logically follow that there has  
8 been an increase in the number of research reports featuring specific expressions unique to  
9 LLMs. This study, therefore, tests the hypothesis that the adoption of certain scientific  
10 terminologies has risen following the advent of ChatGPT. Focusing on words and phrases  
11 frequently reported as used by ChatGPT, I investigated PubMed records from 2000 onwards  
12 and performed a comparison using phrases commonly used in academia as a control. This  
13 analysis aims to empirically explore the influence of LLMs on the lexicon of medical  
14 literature.

15

## 16 **Methods**

### 17 2 Methods

#### 18 2.1 Search for Records

19 Unlike earlier studies,<sup>12-14</sup> this research, drawing insights from various anonymous end-users,  
20 extracted potentially AI-influenced terms from Reddit, X (formerly Twitter), blogs, and  
21 forums, focusing on words and phrases frequently produced by LLMs. The selection of these  
22 terms was carried out through a rigorous manual curation process from April 12 to May 11,  
23 2024, identifying 117 potentially AI-influenced terms. In addition, as a control group, I used  
24 the top 100 collocations identified as characteristic of the academic corpus in a previous  
25 study.<sup>18</sup> Phrases that could be searched on PubMed as two consecutive words were included  
26 (for example, the collocation "between and" is used in the form of "between A and B," so it

- 1 was excluded as no records were found when searching for "between and [Text Word]"). In
- 2 the end, 75 common academic phrases were chosen for verification in this study. The list of
- 3 these phrases appears in Table 1.

Table 1. Words and phrases examined for usage rates

---

**Potentially AI-influenced terms**

Verbs

align, bolster, burgeon, captivate, catalyze, compel, delve, demystify, dive, elevate, elucidate, embark, embrace, employ, encounter, endeavor, enhance, enrich, explore, facilitate, foster, harness, leverage, mitigate, navigate, nuance, optimize, pave, pioneer, resonate, revolutionize, safeguard, shed light, showcase, streamline, underscore, unleash, unlock, unveil, utilize

Adjectives

aesthetic, commendable, comprehensive, crucial, cutting-edge, disruptive, dynamic, essential, ever-evolving, fresh, groundbreaking, holistic, illustrious, imperative, innovative, invaluable, intricate, keen, meticulous, methodical, multifaceted, notable, noteworthy, overarching, paramount, pivotal, poised, potent, robust, seamless, tailored, transformative, unparalleled, unprecedented, unwavering, valuable, versatile, vibrant, vital

Adverbs

additionally, aptly, effectively, excellently, impressively, ingeniously, moreover, reportedly, scholarly, strategically, ultimately, undoubtedly

Nouns

adventure, beacon, capability, complexity, cornerstone, digital world, driving force, enigma, game-changer, hurdle, interplay, intersection, journey, kaleidoscope, landscape, new era, paradigm shift, prowess, realm, spearhead, state-of-the-art, symphony, synergy, tapestry, testament, treasure trove

**Common academic phrases (controls)**

according to, are presented, are shown, associated with, association between, based on, between groups, can be, changes in, characterized by, compared to, compared with, consistent with, control group, correlated with, correlation between, current study, data set, decrease in, defined as, defined by, determined by, differences between, due to, effect on, exposure to, follow up, have shown, higher than, in addition, in contrast, increase in, indicate that, interaction between, is consistent, no significant, number of, obtained from, occurrence of, our results, our study, over time, participants were, percentage of, present study, prevalence of, previous studies, related to, relationship between, respect to, results obtained, sample size, show that, significant between, significant difference, significantly different, significantly higher, statistically significant, subset of, suggest that, these findings, these results, this article, this paper, this study, to determine, to evaluate, was calculated, was measured, was performed, was used, were collected, were determined, were significantly, with respect

---

- 4 I used PubMed's advanced search feature (<https://pubmed.ncbi.nlm.nih.gov/advanced/>) to
- 5 reveal the number of records in which these words were used by searching for "Text Word".
- 6 To ensure comprehensive coverage of verb forms in English, the search query included the
- 7 base form, third person singular present, present participle/progressive, past tense, and past

1   participle. For nouns, both singular and plural forms were incorporated. Considering the  
2   daily increase in records indexed in PubMed, the search conditions were standardized from  
3   January 1, 2000, to April 30, 2024. The search formulas for all words/phrases are shown in  
4   Supplementary Table S1.

5

## 6   2.2 Data Preparation

7   To investigate the usage trends of potentially AI-influenced terms in the PubMed database,  
8   we first calculated the usage frequency of each term by dividing the number of records  
9   containing the term by the total number of records in PubMed for each year from 2000 to  
10   2024 (up to April 30, 2024). This process yielded a dataset with usage frequency for each  
11   term and year. Next, the modified Z-score transformation was used to normalize the usage  
12   frequency and facilitate comparisons across terms and years. For each term, the median and  
13   median absolute deviation (MAD) were calculated. The modified Z-score was computed by  
14   subtracting the median from each occurrence rate, dividing the result by the MAD, and  
15   multiplying by 0.6745. To identify significant deviations in term usage, we considered an  
16   absolute modified Z-score of 3.5 or higher as indicative of a meaningful increase or  
17   decrease<sup>19</sup>. The resulting dataset, containing the modified Z-scores for each term and year,  
18   was then used for further statistical analysis.

19

## 20   2.3 Statistical Analysis

21   A linear mixed-effects model was used to compare the usage of potentially AI-influenced  
22   terms and common academic phrases from 2000 to 2024. The data, consisting of modified Z-  
23   scores for each word or phrase, were obtained and reshaped into a long format. The model,

1 constructed using the 'lme' function from the 'nlme' package in R, included the modified Z-  
2 scores as the dependent variable, the group (potentially AI-influenced terms or common  
3 academic phrases) as a fixed effect, and a random intercept for each word or phrase to  
4 account for repeated measures. The model's summary was generated to assess the  
5 significance of the fixed effect of the group on term usage. A line plot with 95% confidence  
6 intervals was created using the 'ggplot2' package to visualize the trends in mean usage for  
7 each group from 2000 to 2024. The significance level for all statistical tests was set at 0.05.  
8 The analysis was performed using R version 4.3.2.

9

## 10 **Results**

11 A total of 26,403,493 records between January 1, 2000, and April 30, 2024 were extracted  
12 from PubMed. The frequency rates of each word/phrase were determined using the annual  
13 total number of records as the denominator, followed by the calculation of the modified Z-  
14 score. The Modified Z-score for all the words and phrases across all periods is shown in  
15 Supplementary Table S2.

16 In this study, among the 117 potentially AI-influenced terms verified, 74 words/phrases  
17 (listed in descending order: 'delve,' 'underscore,' 'meticulous,' 'commendable,' 'showcase,'  
18 'intricate,' 'tapestry,' 'symphony,' 'impressively,' 'realm,' 'cutting-edge,' 'prowess,' 'captivate,'  
19 'noteworthy,' 'groundbreaking,' 'unlock,' 'compel,' 'leverage,' 'notable,' 'unveil,' 'ingeniously,'  
20 'pivotal,' 'bolster,' 'holistic,' 'safeguards,' 'elevate,' 'unwavering,' 'transformative,' 'pioneer,'  
21 'enigma,' 'embark,' 'invaluable,' 'testament,' 'nuance,' 'mitigate,' 'game-changer,' 'valuable,'  
22 'endeavor,' 'imperative,' 'crucial,' 'revolutionize,' 'unleash,' 'effectively,' 'employ,' 'digital  
23 world,' 'foster,' 'demystified,' 'multifaceted,' 'navigate,' 'ever-evolving,' 'streamline,'  
24 'intersection,' 'utilize,' 'harness,' 'shed light,' 'strategically,' 'seamless,' 'encounter,' 'essential,'  
25 'align,' 'additionally,' 'pave,' 'poised,' 'innovative,' 'synergy,' 'comprehensive,' 'burgeon,' 'aptly,'



1 'dive,' 'unparalleled,' 'ultimately,' 'vital,' 'journey,' 'enhance' ) displayed a modified Z-score  
2 exceeding 3.5 in 2024. While the majority of the 75 common academic phrases (controls)  
3 displayed no significant deviations in usage rates, phrases such as 'occurrence of,' 'these  
4 findings,' 'have shown,' 'interaction between,' and 'characterized by' surpassed a modified Z-  
5 score of 3.5 in 2024. On the other hand, the phrases 'percentage of,' 'was measured,'  
6 'number of,' 'with respect,' 'respect to,' and 'to determine' registered modified Z-scores  
7 below -3.5 in the same year (Figure 1).

8 [Insert Figure 1 here]

9 The linear mixed-effects model revealed a significant effect of the group (potentially AI-  
10 influenced terms vs. common academic phrases) on the usage frequency. The model  
11 showed that the usage of potentially AI-influenced terms was significantly higher than that  
12 of common academic phrases ( $\beta = 0.554$ ,  $SE = 0.080$ ,  $t(190) = 6.969$ ,  $p < 0.001$ ). The line plot  
13 (Figure 2) illustrates the trends in mean frequency for potentially AI-influenced terms and  
14 common academic phrases from 2000 to 2024. While the frequency of the control group  
15 remains relatively stable, the potentially AI-influenced terms begin to show an increase  
16 around 2016, with a notable and steep upward trajectory starting in 2020 that becomes  
17 particularly pronounced in 2023 and 2024.

18 [Insert Figure 2 here]

19

## 20 **Discussion**

21 This study demonstrated that, in the fields of medicine and biology, a number of specific  
22 words and phrases, led by "delve," "underscore," "meticulous," and "commendable," have  
23 come to be used more frequently following the advent of ChatGPT. The increasing trend in  
24 the usage rates of these words/phrases was more pronounced in 2024 than in 2023 in  
25 almost all cases. This may reflect the generalization of LLM use among researchers in the

1 fields of medicine and biology, as shown in previous findings.<sup>13</sup> The list of overused terms  
2 suggested in this study will help those writing with LLMs centered around ChatGPT.  
3 It has been observed that medical texts generated by ChatGPT, while fluent and logical, tend  
4 to include less specific information and more generalized expressions compared to those  
5 authored by humans, which feature a richer and more diverse content.<sup>10</sup> In general papers,  
6 it has been noted that ChatGPT tends to 1) use the same style and expressions repeatedly, 2)  
7 show a decrease in the frequency of basic verbs like 'is' and 'are,' and 3) frequently use  
8 adjectives and adverbs.<sup>11</sup> Particularly for adjectives and adverbs, numerous words that  
9 ChatGPT frequently uses have been pointed out.<sup>14</sup> Because this study only counted the  
10 records where specific words or phrases occurred, it did not evaluate the weight of terms  
11 appearing multiple times. In the current study, several words that were previously identified  
12 as frequently used by ChatGPT did not exhibit a notable increase in usage; yet, ChatGPT may  
13 actually overuse these words more than suggested by the results of this study. Similarly,  
14 frequently used verbs such as 'enhance', 'elevate', and 'utilize' may also have been overused  
15 by LLMs more than suggested by this study.

16 A previous reports' limitation lies in their lack of focus on the specific words or terms  
17 overused by ChatGPT, thus failing to comprehensively explore characteristic terms. As  
18 extensively debated online  
19 ([https://www.reddit.com/r/mildlyinfuriating/comments/1bzvgqj/apparently\\_using\\_the\\_wor](https://www.reddit.com/r/mildlyinfuriating/comments/1bzvgqj/apparently_using_the_word_delve_is_a_sign_of_the/)  
20 [d\\_delve\\_is\\_a\\_sign\\_of\\_the/](https://www.reddit.com/r/mildlyinfuriating/comments/1bzvgqj/apparently_using_the_word_delve_is_a_sign_of_the/) [Accessed 2024, April 12]), the increased usage of the word  
21 'delve' was incredibly pronounced compared to other words or phrases, with a modified Z-  
22 score of around 100. Despite its overwhelming presence, previous papers compared texts  
23 created by humans and ChatGPT<sup>12-14</sup> did not mention 'delve,' highlighting a strength of this  
24 study's methodology. This study cannot conclusively establish the connection between the  
25 frequent use of 'delve' and the emergence of ChatGPT, although its impact is highly  
26 suspected. The frequent use of the term 'delve' by ChatGPT could be attributed to its

1 prominence in the training data, possibly resulting from common instructions during the  
2 reinforcement learning from human feedback phase, or as a feature of large language  
3 models designed to project authority; however, these hypotheses remain speculative and  
4 unconfirmed.

5 Notably, the frequency of use for the potentially AI-influenced terms investigated in this  
6 study had already diverged markedly even before ChatGPT released in November 2022. In  
7 particular, 'delve' was used exceptionally often in 2024, but it had also been used at an  
8 exceptionally high frequency in academic writing since 2021. One hypothesis arises from this  
9 observation—many of the potentially AI-influenced terms may have contributed to their  
10 overuse in ChatGPT, as these expressions gained popularity during the period of intensive  
11 LLM training. In other words, ChatGPT may have accelerated the inevitable temporal  
12 changes in writing in research. However, this hypothesis would be difficult to verify, since we  
13 cannot observe a parallel universe where ChatGPT does not exist.

14 Interestingly, some of the common academic phrases used as controls also deviated in their  
15 proportion of use in 2024. The four phrases 'occurrence of', 'these findings', 'have shown',  
16 and 'interaction between' significantly increased in frequency of use in 2024, but since they  
17 are all very commonly used expressions in academic writing, it would be difficult for us  
18 humans to recognize that their frequency has increased. Conversely, the six phrases  
19 'percentage of', 'was measured', 'number of', 'with respect', 'respect to', and 'to determine'  
20 notably decreased in usage in 2024. When interpreting these results, we must remember  
21 that the language used in papers naturally evolves over time;<sup>20</sup> many phrases that decreased  
22 in frequency had already been declining even before the introduction of ChatGPT. However,  
23 the two phrases 'to determine' and 'number of' did not show a noticeable decrease in  
24 frequency of use before 2022, and their frequency of use appears to have decreased  
25 significantly after 2023 (see Supplementary Table 2). While this result may be coincidental,

1 it could also indicate that the proliferation of ChatGPT may subtly lead to the decreased use  
2 of certain words or phrases without us recognizing it.  
3 This study has some limitations. The most important limitation is that the terms potentially  
4 influenced by LLMs in this study were identified through manual inspection rather than  
5 being extracted in an objective and systematic manner. Therefore, there may be words or  
6 phrases that were not included in this study yet have seen a significant increase in usage  
7 post-ChatGPT. Additionally, temporal shifts in the frequency of word or phrase use could  
8 have been influenced by external factors such as evolving research trends and shifts in the  
9 style of scientific communication, factors not accounted for in this study. Lastly, the absence  
10 of long-term trend analysis limits our ability to fully assess the impact of AI on language  
11 usage. Particularly, since the data for 2024 is limited to April, it cannot be denied that the  
12 results may fluctuate when looking at the whole year.

13

#### 14 **Conclusion**

15 This study highlights the overuse of specific words and phrases that have become more  
16 prevalent since the introduction of ChatGPT. The list of selected terms discussed in this  
17 study can be advantageous for both users employing LLMs for writing purposes and for  
18 individuals in educational and supervisory capacities within the fields of medicine and  
19 biology. However, the changes in academic writing suggested by this study may be  
20 temporary and specific to 2024; as LLMs improve, distinguishing between human and AI-  
21 generated text may become more challenging.<sup>21</sup> Thus, further studies on future changes in  
22 academic terminology are warranted. Many researchers are expected to continue using  
23 LLMs for their writing—needless to say, adhering to ethical aspects and taking responsibility  
24 for the final output is crucial for the authors when using these tools.

25

1    **Funding:** This work was supported by the Japan Society for the Promotion of Science (JSPS)  
2    KAKENHI (grant number 22K15778).

3

4    **Author Contributions:** KM conceived the study, developed the methodology, designed and  
5    performed the experiments, collected and analyzed the data, curated the data, wrote the  
6    original draft, reviewed and edited the manuscript, created the visualizations, managed the  
7    project, and acquired the funding. KM is the sole contributor to this work.

8

9    **Acknowledgement:**

10    During the preparation of this work, the author used GPT-4, GPT-4o and Claude 3 Opus for  
11    drafting R code, proofreading the manuscript, and improving the readability of the text.  
12    After using these services, the author reviewed and edited the content as needed and takes  
13    full responsibility for the content of the publication.

14

15    **Conflict of interest statement:** I declare no competing interests.

16

17    **Data sharing:** Data will be shared upon reasonable request to the corresponding author.

18

## 1 References

- 2 1. Biswas S. ChatGPT and the Future of Medical Writing. *Radiology*. 2023; 307 (2): e223312.
- 3 2. Salvagno M, Taccone FS, Gerli AG. Can artificial intelligence help for scientific writing? *Crit Care*.
- 4 2023; 27 (1): 75.
- 5 3. Lin Z. Towards an AI policy framework in scholarly publishing. *Trends Cogn Sci*. 2024; 28 (2): 85-88.
- 6 4. Thorp HH. ChatGPT is fun, but not an author. *Science (New York, NY)*. 2023; 379 (6630): 313.
- 7 5. Lin Z. Techniques for supercharging academic writing with generative AI. *Nat Biomed Eng*. 2024.
- 8 6. Berdejo-Espinola V, Amano T. AI tools can improve equity in science. *Science*. 2023; 379 (6636): 991.
- 9 7. Hwang SI, Lim JS, Lee RW, *et al*. Is ChatGPT a "Fire of Prometheus" for Non-Native English-
- 10 Speaking Researchers in Academic Writing? *Korean J Radiol*. 2023; 24 (10): 952-959.
- 11 8. Matsui K, Koda M, Yoshida K. Implications of Nonhuman "Authors". *Jama*. 2023; 330 (6): 566.
- 12 9. AlAfnan MA, MohdZuki SF. Do artificial intelligence chatbots have a writing style? An investigation
- 13 into the stylistic features of ChatGPT-4. *Journal of Artificial intelligence and technology*. 2023; 3 (3): 85-94.
- 14 10. Liao W, Liu Z, Dai H, *et al*. Differentiating ChatGPT-Generated and Human-Written Medical Texts:
- 15 Quantitative Study. *JMIR Med Educ*. 2023; 9: e48904.
- 16 11. Geng M, Trotta R. Is ChatGPT Transforming Academics' Writing Style? *arXiv preprint*
- 17 *arXiv:240408627*. 2024.
- 18 12. Gray A. ChatGPT" contamination": estimating the prevalence of LLMs in the scholarly literature.
- 19 *arXiv preprint arXiv:240316887*. 2024.
- 20 13. Liang W, Zhang Y, Wu Z, *et al*. Mapping the increasing use of llms in scientific papers. *arXiv preprint*
- 21 *arXiv:240401268*. 2024.
- 22 14. Liang W, Izzo Z, Zhang Y, *et al*. Monitoring ai-modified content at scale: A case study on the impact
- 23 of chatgpt on ai conference peer reviews. *arXiv preprint arXiv:240307183*. 2024.
- 24 15. Song C, Song Y. Enhancing academic writing skills and motivation: assessing the efficacy of
- 25 ChatGPT in AI-assisted language learning for EFL students. *Front Psychol*. 2023; 14: 1260843.
- 26 16. Jeyaraman M, Ramasubramanian S, Balaji S, *et al*. ChatGPT in action: Harnessing artificial
- 27 intelligence potential and addressing ethical challenges in medicine, education, and scientific research. *World J*
- 28 *Methodol*. 2023; 13 (4): 170-178.
- 29 17. Cheng H, Sheng B, Lee A, *et al*. Have AI-Generated Texts from LLM Infiltrated the Realm of
- 30 Scientific Writing? A Large-Scale Analysis of Preprint Platforms. *bioRxiv*. 2024: 2024-2003.
- 31 18. Durrant P. Investigating the viability of a collocation list for students of English for academic
- 32 purposes. *English for Specific Purposes*. 2009; 28 (3): 157-169.
- 33 19. Crosby T. How to detect and handle outliers. In: Taylor & Francis; 1994.
- 34 20. Park M, Leahey E, Funk RJ. Papers and patents are becoming less disruptive over time. *Nature*. 2023;
- 35 613 (7942): 138-144.
- 36 21. Herbold S, Hautli-Janisz A, Heuer U, *et al*. A large-scale comparison of human-written versus
- 37 ChatGPT-generated essays. *Scientific reports*. 2023; 13 (1): 18617.

38



1 **Figure Legends**

2 **Figure 1.** Scatter plot of word/phrase usage frequency vs. modified Z-Score in 2024.

3 Figure 1 illustrates the relationship between the frequency of use and the modified Z-scores for

4 words and phrases with absolute modified Z-scores exceeding 3.5 in 2024. Red circles represent

5 potentially AI-influenced terms, while grey circles represent common academic phrases (controls).

6 The x-axis shows the number of total records using the words/phrases on a logarithmic scale, and

7 the y-axis displays the modified Z-score for usage frequency.

8

9 **Figure 2.** Mean usage (modified Z-scores) of potentially AI-influenced terms and common

10 academic phrases from 2000 to 2024. Shaded areas represent 95% confidence intervals.

11

12



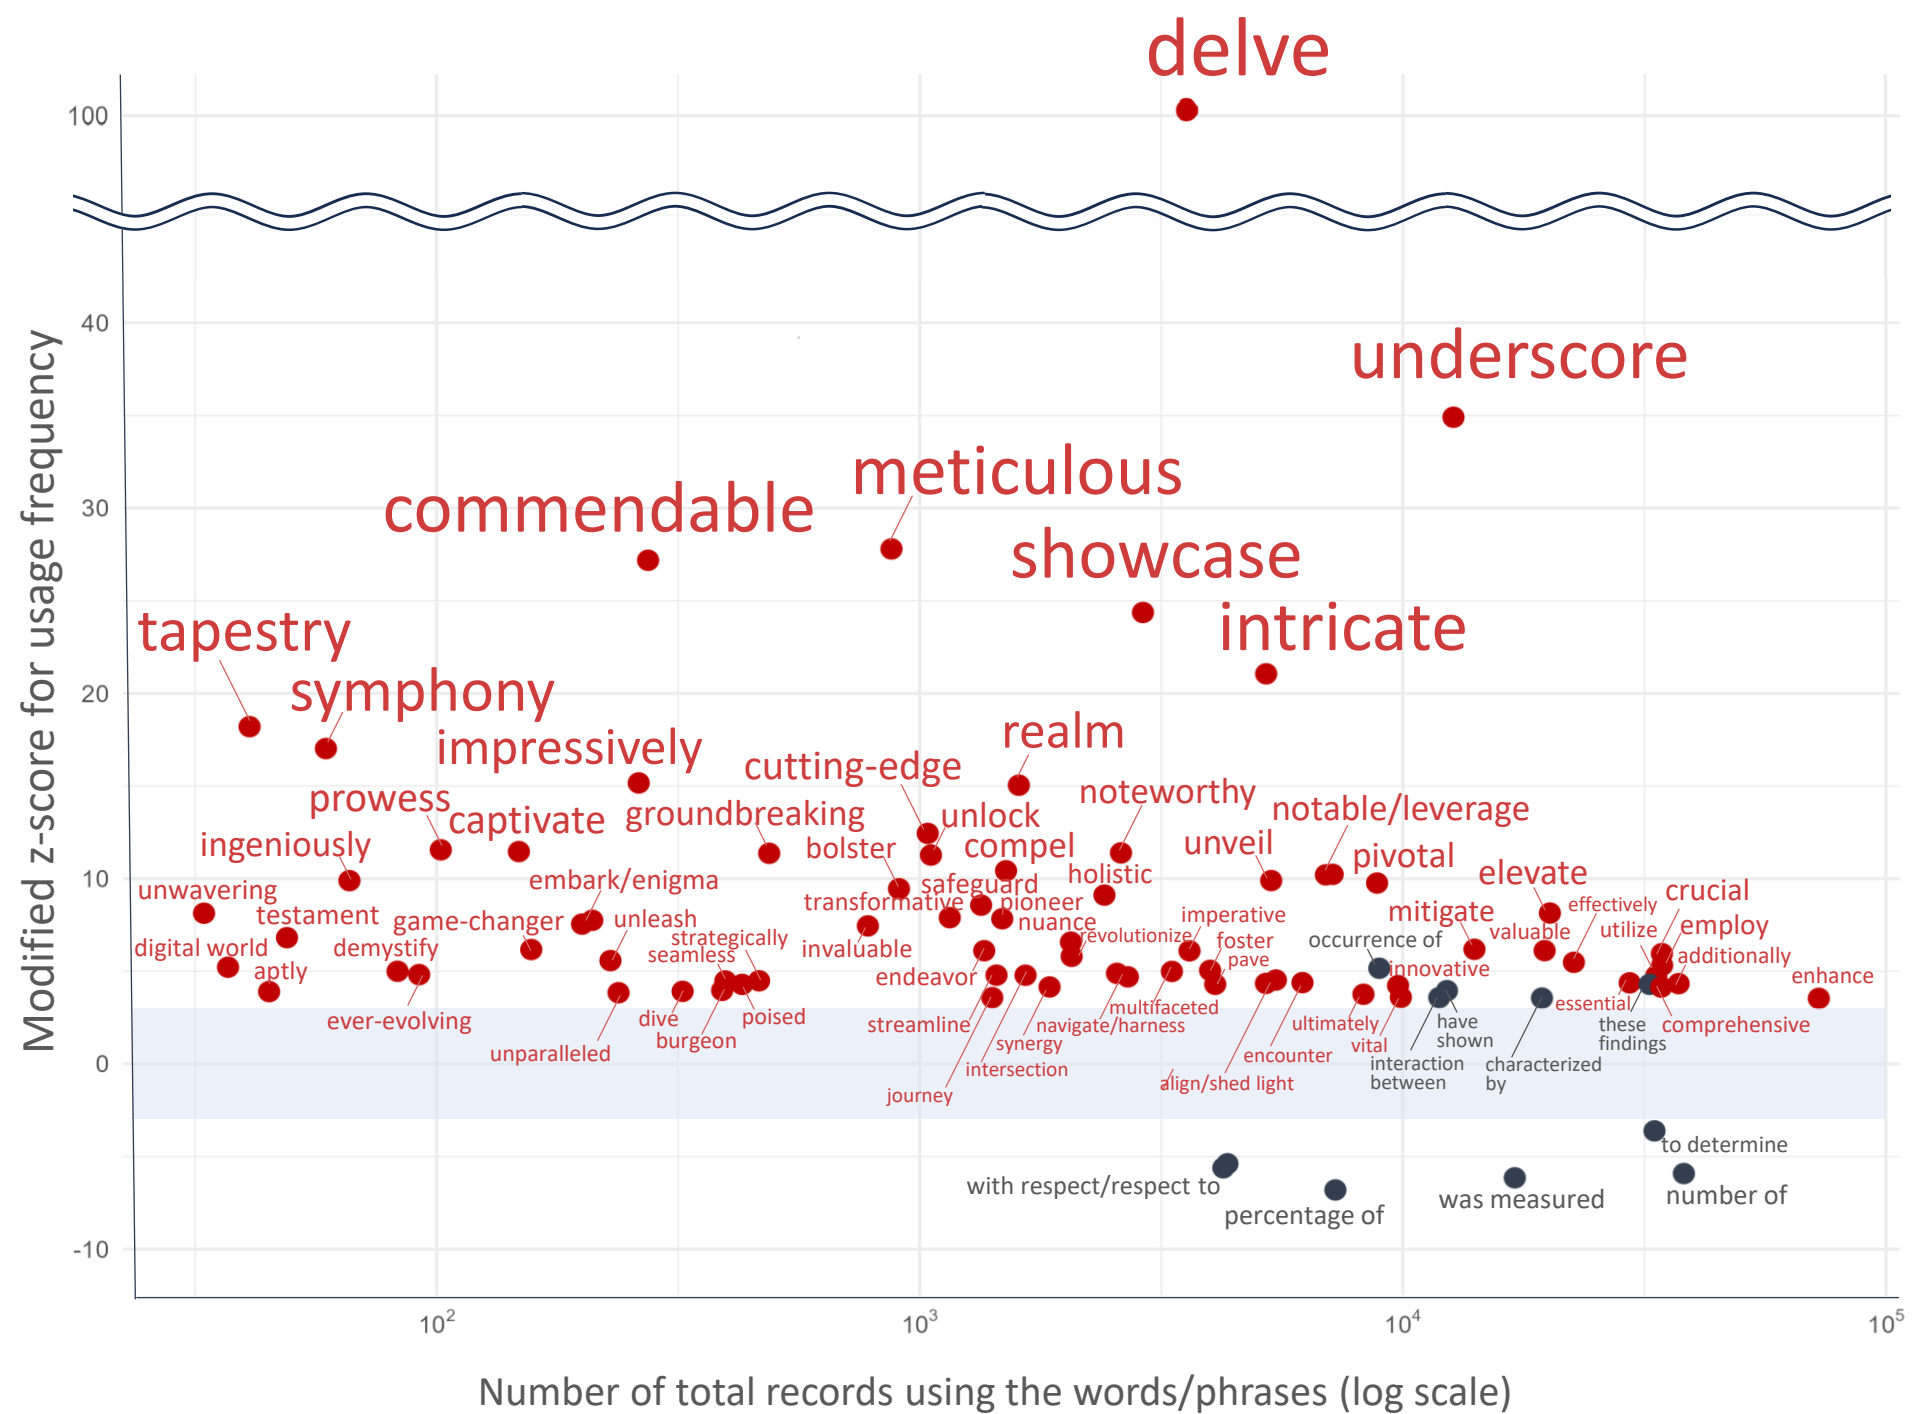

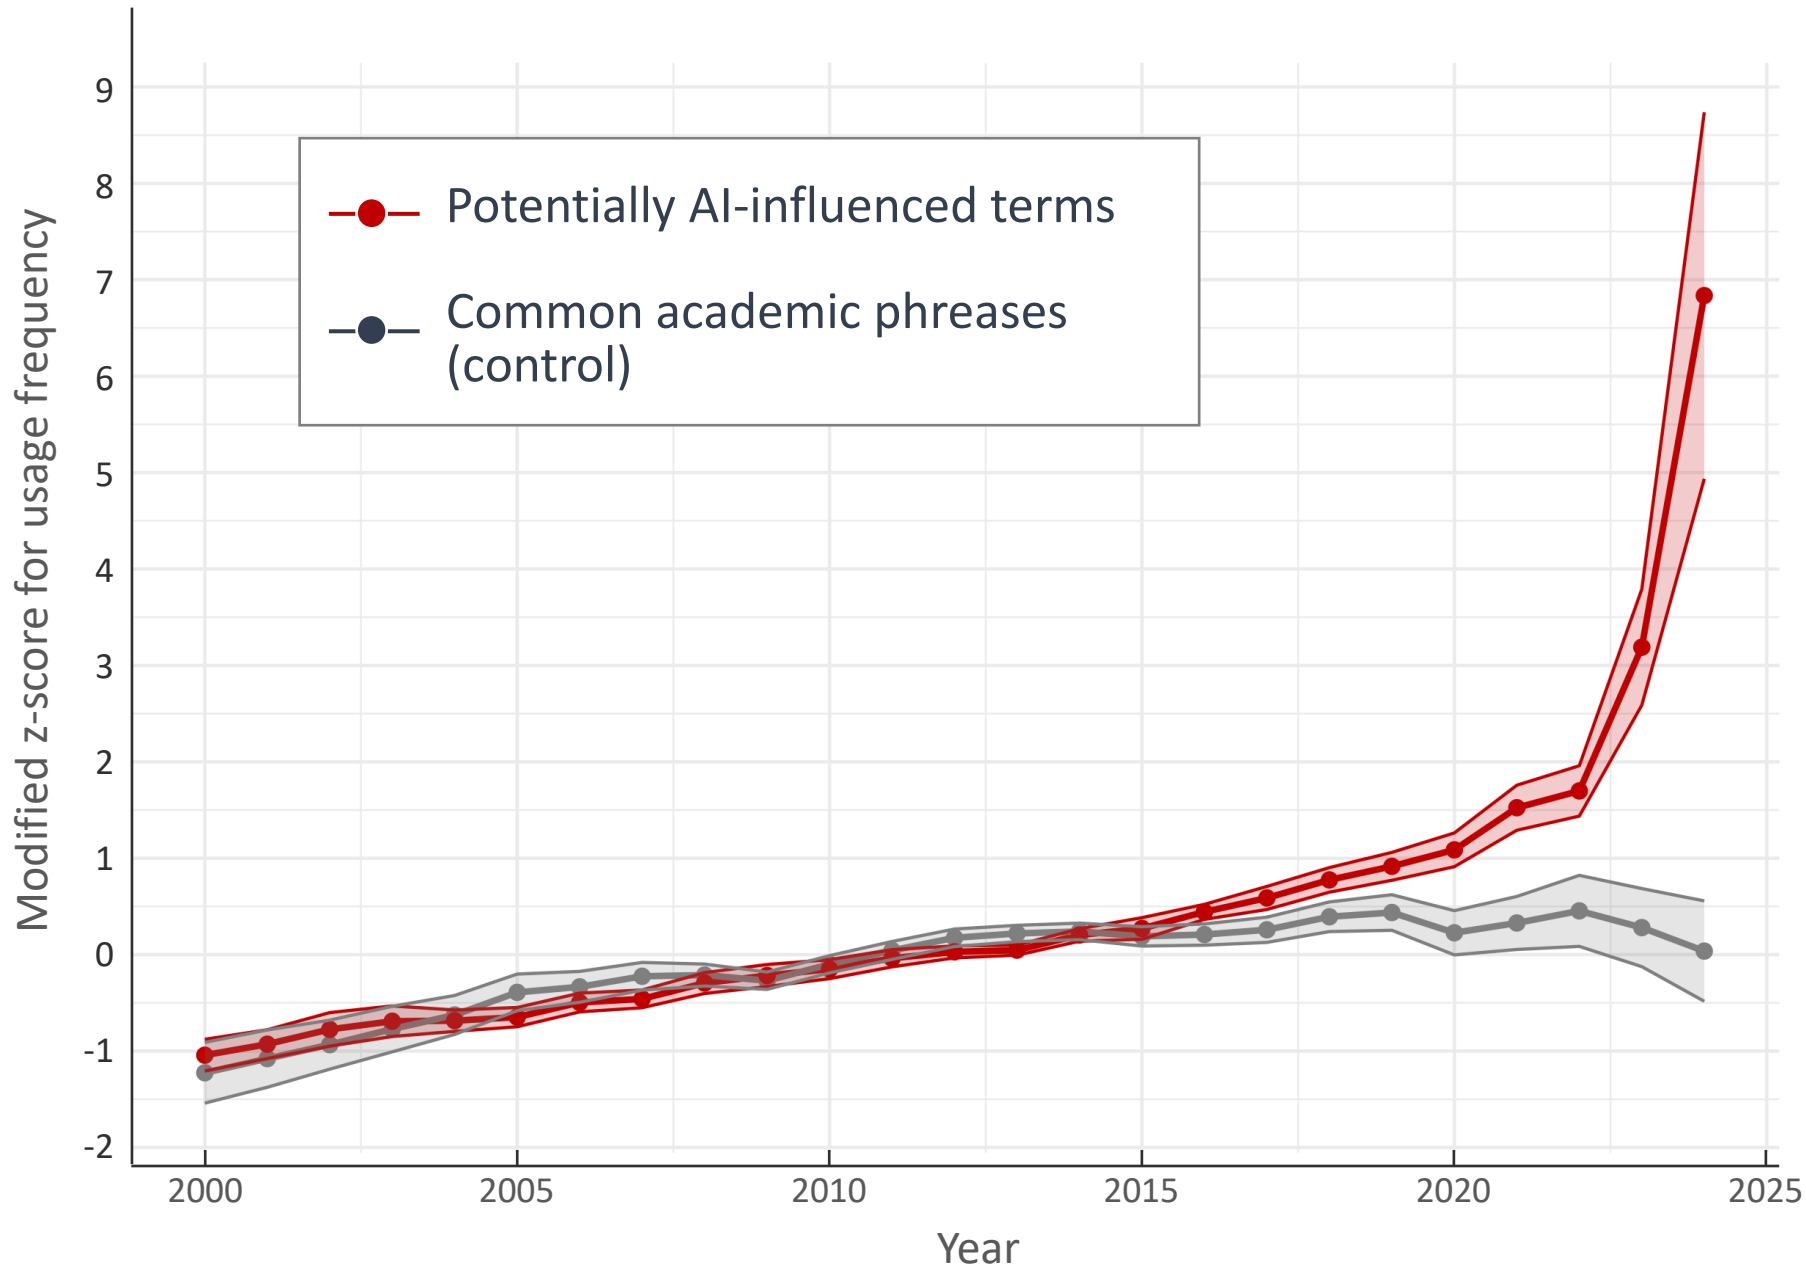

Source: https://medrxiv.org/content/10.1101/2024.05.14.24307373v1.full.pdf
